# Supplementary material
Source: PubMed Central journal article supplement (PMC1934051)
Supplement: bjpg56-918TableS1.pdf [file bjpg56-918TableS1.pdf]

**Supplementary Table 1. Characteristics of practices responding or not responding to the survey.**

|                                    | Yes (n = 245) <sup>a</sup> |                         | No (n = 146) <sup>a</sup> |               | Comparison between responding and non-responding practices |  |
|------------------------------------|----------------------------|-------------------------|---------------------------|---------------|------------------------------------------------------------|--|
|                                    | Mean                       | Mean                    | Difference                | 95% CI        | P-value                                                    |  |
| Response to survey                 |                            |                         |                           |               |                                                            |  |
| Practice list size                 | 6710                       | 5971                    | 739                       | -107 to 1585  | 0.087                                                      |  |
| Number of GPs (FTE)                | 3.4                        | 2.9                     | 0.50                      | 0.05 to 0.96  | 0.029                                                      |  |
| Access points under QOF            | 49                         | 49                      | -0.1                      | -1.5 to 1.2   | 0.735                                                      |  |
| Total QOF points                   | 966                        | 953                     | 13.3                      | -11.8 to 38.3 | 0.443                                                      |  |
|                                    | Number of practices (%)    | Number of practices (%) | Odds ratio                | 95% CI        | P-value                                                    |  |
| Proportion single-handed practices | 46 (20)                    | 43 (33)                 | 0.51                      | 0.31 to 0.83  | 0.006                                                      |  |
| Personal Medical Services contract | 84 (37)                    | 54 (41)                 | 0.81                      | 0.52 to 1.27  | 0.363                                                      |  |
| Training practice <sup>b</sup>     | 81 (36)                    | 32 (25)                 | 1.66                      | 1.03 to 2.70  | 0.038                                                      |  |
| Any dispensing patients            | 33 (14)                    | 19 (15)                 | 0.98                      | 0.53 to 1.81  | 0.958                                                      |  |

<sup>a</sup>Data from GMS statistics (2004) and QOF data (2004-2005) available for 229 and 232 responder practices respectively and 132 and 135 non-responder practices respectively. GMS statistics provided by Andrew Wagner, National Primary Care and Development Centre. QOF data available from Health and Social Care Information Centre<sup>15</sup>. <sup>b</sup>Data about training practice status relates to GMS statistics from 2003.
