# Supplementary material
Source: PubMed Central journal article supplement (PMC1934051)
Supplement: bjpg56-918TableS2.pdf [file bjpg56-918TableS2.pdf]

Supplementary Table 2. Practice characteristics.

|                                                    | Advanced Access?         |                         | Comparison between Advanced Access and non-Advanced Access practices |               |         |
|----------------------------------------------------|--------------------------|-------------------------|----------------------------------------------------------------------|---------------|---------|
|                                                    | Yes (n=162) <sup>a</sup> | No (n=79) <sup>a</sup>  | Odds ratio                                                           | 95% CI        | P-value |
|                                                    | Number of practices (%)  | Number of practices (%) |                                                                      |               |         |
| <b>Doctor continuity</b>                           |                          |                         |                                                                      |               |         |
| See any doctor                                     | 58 (39.2)                | 32 (42.7)               |                                                                      |               |         |
| Same doctor encouraged                             | 39 (26.4)                | 17 (22.7)               | 1.27                                                                 | 0.62 to 2.59  |         |
| Always same doctor                                 | 51 (34.5)                | 26 (34.7)               | 1.08                                                                 | 0.57 to 2.05  | 0.811   |
| General Medical Services contract                  | 96 (59.6)                | 43 (55.1)               | 1.20                                                                 | 0.91 to 2.08  | 0.509   |
| Training practice                                  | 66 (41.3)                | 24 (30.4)               | 1.61                                                                 | 0.91 to 2.86  | 0.104   |
| Participate in Directed Enhanced Service on Access | 134 (93.7)               | 45 (69.2)               | 6.62                                                                 | 2.81 to 15.58 | <0.001  |
| Receive deprivation payments                       | 85 (55.9)                | 36 (49.3)               | 1.30                                                                 | 0.75 to 2.28  | 0.353   |
| Previously a fundholding practice                  | 69 (44.2)                | 27 (35.5)               | 1.44                                                                 | 0.82 to 2.54  | 0.207   |
| <b>Location</b>                                    |                          |                         |                                                                      |               |         |
| Rural                                              | 42 (27.3)                | 24 (31.6)               |                                                                      |               |         |
| Urban                                              | 90 (58.4)                | 35 (46.1)               | 1.47                                                                 | 0.78 to 2.77  |         |
| Inner city                                         | 22 (14.3)                | 17 (22.4)               | 0.74                                                                 | 0.33 to 1.66  | 0.159   |
| Offer 'open' surgeries                             | 33 (21.3)                | 12 (15.6)               | 1.47                                                                 | 0.71 to 3.03  | 0.302   |
|                                                    | Mean (SD)                | Mean (SD)               | Difference                                                           | 95% CI        | P-value |
| List size                                          | 6891 (3629)              | 5827 (3598)             | 1064                                                                 | 80 to 2048    | 0.034   |
| Doctors WTE <sup>b</sup>                           | 3.70 (2.57)              | 3.44 (2.06)             | 0.27                                                                 | -0.31 to 0.85 | 0.366   |
| Nurse practitioners WTE <sup>b</sup>               | 0.49 (0.92)              | 0.32 (0.65)             | 0.17                                                                 | -0.06 to 0.41 | 0.143   |
| Nurses WTE <sup>b</sup>                            | 1.36 (1.09)              | 1.47 (1.29)             | -0.11                                                                | -0.44 to 0.22 | 0.509   |
| Healthcare assistants WTE <sup>b</sup>             | 0.47 (0.53)              | 0.39 (0.49)             | -0.07                                                                | -0.07 to 0.22 | 0.321   |

The number of observations differs for each question depending upon the number of missing answers. The percent given relates to the observations excluding missing data. <sup>a</sup>4 practices did not indicate whether or not they used Advanced Access. <sup>b</sup>WTE = Whole time equivalence.
